# Supplementary material
Source: publisher site journal article supplement (https://www.kjim.org/upload/media/kjim-2024-131-Supplementary-Table-3.pdf)
Supplement: Supplementary file 1 [file kjim-2024-131-Supplementary-Table-3.pdf]

**Supplementary Table 3. Cause of death in normotensive and high-risk patients**

| Variable                   | Normotensive patients (n = 343) | High-risk patients (n = 31) |
|----------------------------|---------------------------------|-----------------------------|
| All-cause mortality        | 17 (5.0)                        | 11 (35.5)                   |
| PE-related death           | 7 (2.0)                         | 9 (29.0)                    |
| Non-PE-related death       | 10 (2.9)                        | 2 (6.5)                     |
| Respiratory disorders      | 4 (1.2)                         | 2 (6.5)                     |
| Neoplasm                   | 4 (1.2)                         | 0 (0.0)                     |
| Cerebrovascular disorders  | 1 (0.3)                         | 0 (0.0)                     |
| Gastrointestinal disorders | 1 (0.3)                         | 0 (0.0)                     |

Values are presented as number (%).

PE, pulmonary embolism.
